# Supplementary material for: Pharmacokinetics and safety after once and twice a day doses of meclizine hydrochloride administered to children with achondroplasia
Source: PubMed Central journal article supplement (PMC7153885; doi:10.1371/journal.pone.0229639), 2020-04-13
Supplement: pone.0229639.s007.pdf [file pone.0229639.s007.pdf]

| Subject | C <sub>max</sub> | C <sub>min</sub> | AUC <sub>312-336h</sub> |
|---------|------------------|------------------|-------------------------|
| MEC-01  | 185              | 11.1             | 1359                    |
| MEC-02  | 250              | 3.7              | 870                     |
| MEC-03  | 96               | 5.3              | 630                     |
| MEC-04  | 63               | 1.2              | 315                     |
| MEC-05  | 101              | 2.6              | 362                     |
| MEC-06  | 93               | 1                | 396                     |
| Mean    | 131.3            | 4.1              | 656                     |
| SD      | 71.1             | 3.8              | 403                     |
| CV%     | 54%              | 91%              | 61%                     |
| MEC-07  | 131              | 6.3              | 1058                    |
| MEC-08  | 211              | 18.2             | 1651                    |
| MEC-09  | 164              | 20.2             | 1865                    |
| MEC-10  | 252              | 14.0             | 1923                    |
| MEC-11  | 296              | 36.7             | 2957                    |
| Mean    | 210.8            | 19.1             | 1891                    |
| SD      | 66.2             | 11.2             | 687                     |
| CV%     | 31%              | 59%              | 36%                     |

SD: standard deviation

CV: coefficient of variation
